# Supplementary material
Source: PubMed Central journal article supplement (PMC7115495)
Supplement: mmc1.pdf [file mmc1.pdf]

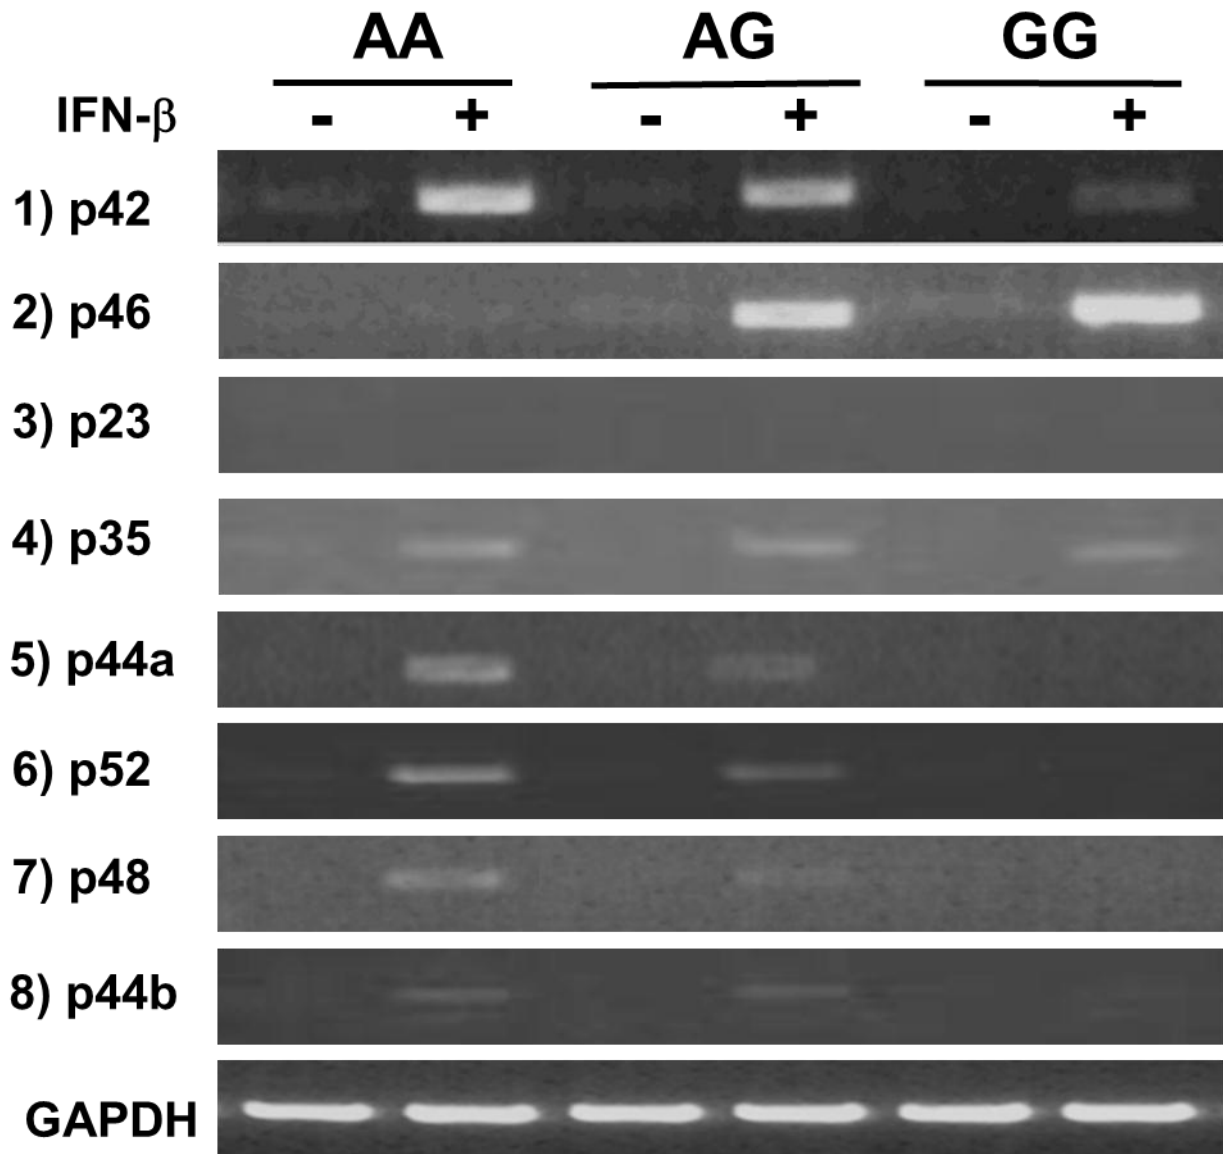

**Supplementary Figure 1** Differences in *OAS1* transcripts in HBE cells with different rs10774671 genotypes

Expression of transcript variants in HBE cells with AA, AG or GG genotypes of rs10774671 are shown. HBE cells were stimulated with IFN- $\beta$  (1000 IU/ml); after 18 h, the cells were harvested and the total RNA was extracted. Transcript variants were detected by RT-PCR with primer sets designed to specifically amplify each transcript (primers in Suppl. Table 1). The cycling condition involved 30 cycles each of 95°C for 15 s, 65°C for 15 s, and 72°C for 1 min. The PCR products were electrophoresed on 2% agarose gels containing ethidium bromide. While the p46 transcript was expressed in HBE cells with the G allele, the p42, p44a, p48, p52, and p44b transcripts were preferentially expressed in those with the A allele. The p35 transcript was expressed in both cells, while we did not detect the p23 transcript.
