# Supplementary material
Source: PubMed Central journal article supplement (PMC7115495)
Supplement: mmc2.pdf [file mmc2.pdf]

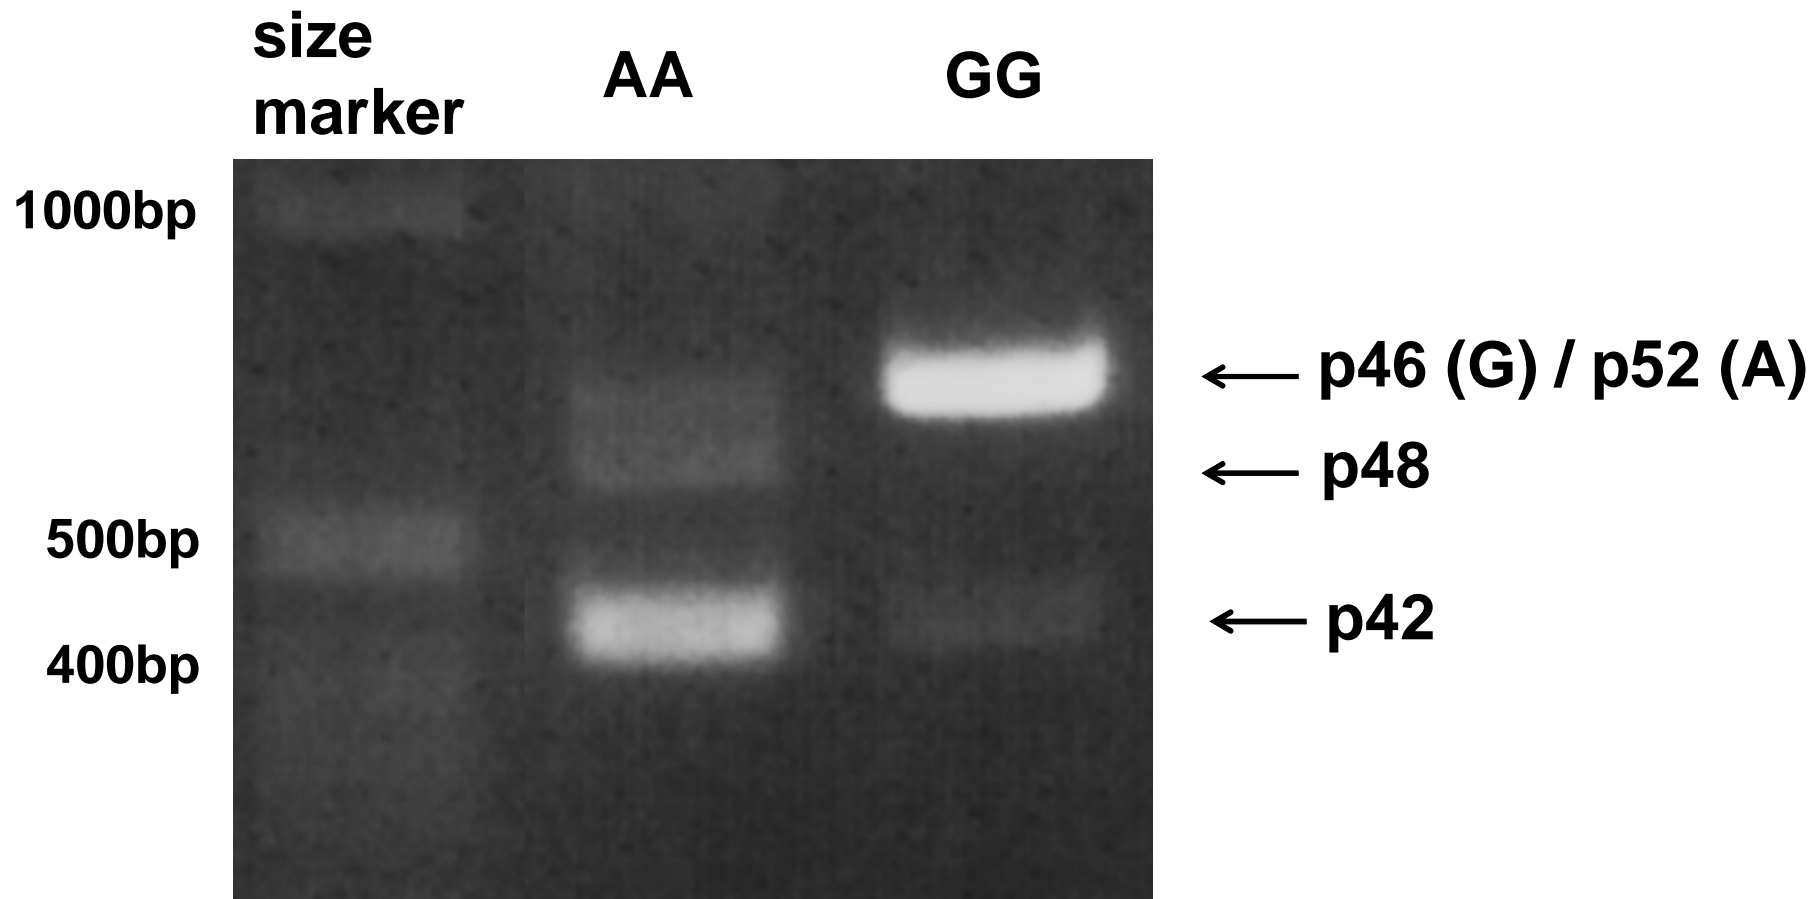

**Supplementary Figure 2** 3'-RACE analysis in HBE cells with AA or GG genotypes of rs10774671

The p42, p48 and p52 transcripts were identified in HBE cells with the AA genotype, while only p42 and p46 transcripts were identified in those with the GG genotype.
